# Supplementary material for: Enhanced implementation of low back pain guidelines in general practice: study protocol of a cluster randomised controlled trial
Source: PubMed Central journal article supplement (PMC4015716; doi:10.1186/1748-5908-8-124), 2013-10-20
Supplement: 1748-5908-8-124-S1.pdf [file 1748-5908-8-124-S1.pdf]

## Additional files

Additional file 1

## Social medicine questions

---

### EMPLOYMENT STATUS

Outside the workforce (Retired, student, etc.)

Unemployed

→ Does the LBP raise a concern about return to work?

No

Yes

If yes, state any action taken

Planned contact to a job centre

Social medicine referral

Occupational medicine referral

Other actions (e.g. planned contact to the labour union)

No actions taken

Employed

→ Number of days for sick leave caused by the present episode of LBP

→ Does the LBP raise concern about work retention?

No

Yes

If yes, state any action taken

Planned contact to employer or employer representative

- Planned contact to a job centre
- Social medicine referral
- Occupational medicine referral
- Other actions (e.g. planned contact to the labour union)
- No actions taken

## LEGISLATIVE CLAIMS

- On-going workers compensation claim
  - No
  - Yes

If yes, state any action taken

- Advised in general practice
- Social medicine referral
- Occupational medicine referral
- Other actions (e.g. planned contact to the labour union)
- No actions taken

- On-going insurance claim
  - No
  - Yes

If yes, state any action taken

- Advised in general practice
- Social medicine referral
- Occupational medicine referral

- Other actions (e.g. planned contact to the labour union)
- No actions taken

- On-going disability pension or other pension claim
  - No
  - Yes

If yes, state any action taken

- Advised in general practice
- Social medicine referral
- Occupational medicine referral
- Other actions (e.g. planned contact to the labour union)
- No actions taken

#### OTHER PERSONAL OR SOCIAL ISSUES INFLUENCING LOW BACK PAIN

- No
- Yes

If yes, state which

- Psychological or psychiatric issues
- Other health related issues
- Substance abuse problems
- Personal or family life problems
- Other issues (Prompts a textbox)

If yes, state any action taken

- Advised in general practice

- Psychologist referral
- Social medicine referral
- Other actions (e.g. planned contact to the labour union)
- No actions taken

Additional file 1: **English translation of the** Social medicine screening question.

---
